# Supplementary material for: Nutrient Signaling and Lysosome Positioning Crosstalk Through a Multifunctional Protein, Folliculin
Source: PubMed Central journal article supplement (PMC7063858; doi:10.3389/fcell.2020.00108), 2020-03-03
Supplement: Data_Sheet_1.pdf [file Data_Sheet_1.pdf]

***Supplementary Material***

***Nutrient Signaling and Lysosome Positioning Crosstalk Through a  
Multifunctional Protein, Folliculin***

Diagram showing beta1 and beta2 domains. Sequence alignment for FLCN\_HUMAN ss: FLCN\_HUMAN\_Q8NFG4, FLCN\_MOUSE\_Q8QZS3, FLCN\_Drosophila\_Q9VS33, FLCN\_S.cerevisiae\_P53237, LST7\_K.lactis\_QEU59399.1. Consensus sequence: eeeeehhhhh eeeeee

Diagram showing alpha1 domain. Sequence alignment for FLCN\_HUMAN ss: FLCN\_HUMAN\_Q8NFG4, FLCN\_MOUSE\_Q8QZS3, FLCN\_D.melanogaster\_Q9VS33, Lst7\_S.cerevisiae\_P53237, Lst7\_K.lactis\_QEU59399.1. Consensus sequence: hhhh ee eeeee h hhhhhhhhhhhhhhh

Diagram showing Longin domain with beta3, beta4, beta5, alpha2, and alpha3 domains. Sequence alignment for FLCN\_HUMAN ss: FLCN\_HUMAN\_Q8NFG4, FLCN\_MOUSE\_Q8QZS3, FLCN\_D.melanogaster\_Q9VS33, Lst7\_S.cerevisiae\_P53237, Lst7\_K.lactis\_QEU59399.1. Consensus sequence: eeeee eeeeeeee eeeeeee h hhhhhhhhhhhhhhhhhhh

Diagram showing alpha4 domain. Sequence alignment for FLCN\_HUMAN ss: FLCN\_HUMAN\_Q8NFG4, FLCN\_MOUSE\_Q8QZS3, FLCN\_Drosophila\_Q9VS33, Lst7\_S.cerevisiae\_P53237, Lst7\_K.lactis\_QEU59399.1. Consensus sequence: hhhhhhhhhhhhh h hhhh eeee hhhhhhhhhhhhh

Diagram showing alpha5 domain. Sequence alignment for FLCN\_HUMAN ss: FLCN\_HUMAN\_Q8NFG4, FLCN\_MOUSE\_Q8QZS3, FLCN\_Drosophila\_Q9VS33, Lst7\_S.cerevisiae\_P53237, LST7\_K.lactis\_QEU59399.1. Consensus sequence: hhh hhhhhhhh

Diagram showing alpha1, alpha2, beta1, alpha3, and alpha4 domains. Sequence alignment for FLCN\_HUMAN ss: FLCN\_HUMAN\_Q8NFG4, FLCN\_MOUSE\_Q8QZS3, FLCN\_Drosophila\_Q9VS33, Lst7\_S.cerevisiae\_P53237, Lst7\_K.lactis\_QEU59399.1. Consensus sequence: hhhhhhhhhhhhh hhhhhhhhhhhhh eeeee hhhhhhhhhhhhh hhhh

Diagram showing DENN domain with alpha5, alpha6, beta2, and beta3 domains. Sequence alignment for FLCN\_human ss: FLCN\_HUMAN\_Q8NFG4, FLCN\_MOUSE\_Q8QZS3, FLCN\_Drosophila\_Q9VS33, Lst7\_S.cerevisiae\_P53237, Lst7\_K.lactis\_QEU59399.1. Consensus sequence: hh hhh eee eee

Diagram showing alpha7, alpha8, and alpha9 domains. Sequence alignment for FLCN\_HUMAN ss: FLCN\_HUMAN\_Q8NFG4, FLCN\_MOUSE\_Q8QZS3, FLCN\_Drosophila\_Q9VS33, Lst7\_S.cerevisiae\_P53237, Lst7\_K.lactis\_QEU59399.1. Consensus sequence: hhhhhhhhhhh hhhhhhhhhhh eeeeee hhhhhh

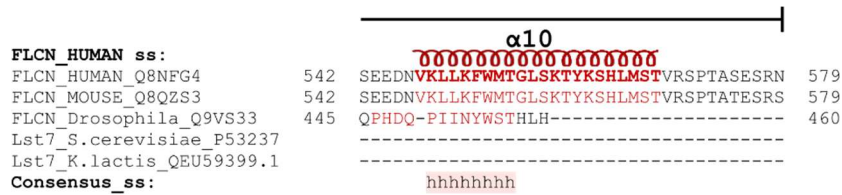

**Supplementary Figure 1: Alignment of multiple FLCN sequences with their respective yeast orthologue, Lst7.** Multiple sequence alignment and secondary structure prediction of FLCN sequences from different species were made with PROMALS3D software (Pei, Kim, and Grishin 2008). Blue residues correspond to putative  $\beta$ -strands while red residues to possible  $\alpha$ -helices. The consensus secondary structure is represented following the next code: e corresponds to  $\beta$ -strands and h to  $\alpha$ -helices. Basic structural elements and domains based on the two recent human FLCN-FNIP2 structures (PDB: 6NZZ, PDB: 6ULG) (Lawrence et al. 2019; Shen et al. 2019) are displayed on the top of the alignment. Protein sequences available in Uniprot (FLCN human: Q8NFG4, FLCN mouse: Q8QZS3, FLCN *D.melanogaster* Q9VS33, Lst7 *S.cerevisiae* P53237) and GenBank (Lst7 *K.lactis* QEU59399.1).

**FNIP2\_HUMAN ss:**

```
FNIP2_HUMAN_9P278 -----
FNIP2_MOUSE_Q80TD3 -----
GH23617p_D.melanogaster_Q
Lst4_S.cerevisiae_P34239_ 1 MLGNLLRNKTSSSGFEKSEHSDFSSVVPNVVYCKAASTGTTKTAAGALLDTAVNVEKPEMLSTTSPP 70
Lst4_K.lactis_Q6CXP4 1 MLGRLLRT-----SSLSEFVPF-----GSS-----NVTVEEEVFQNEP-- 33
Consensus_ss:          hhhh          hhhh
```

**FNIP2\_HUMAN ss:**

```
FNIP2_HUMAN_9P278 1 ---MAPTLQKLFNKRGSSSSSAAASQGRAPKEGP---AFSWSCSE---FDLNEIRLIVQDC--- 55
FNIP2_MOUSE_Q80TD3 1 ---MAPTLQKLFNKRGGG---AASAQARPPKEEP---AFSWSCSE---FGLSDIRLLVYQDC--- 51
GH23617p_D.melanogaster_Q 1 ---M-----HTPPFKSNRFPFEGSQVRVLLYKE--- 25
Lst4_S.cerevisiae_P34239_ 71 ILDHISDDLKLLKLFGRSDI---PYSRPIDTLQNNGLGTDKITSIN---EKTYAFRLIIEEAGQMA 131
Lst4_K.lactis_Q6CXP4 34 --FYMTDDLKTLTYGTRDKA---LFERIANDRLH-----NGGFRLLIISQELGHVT 78
Consensus_ss:          hhhhhheee          eeeeeeeehhhhhh
```

β1

**FNIP2\_HUMAN ss:**

```
FNIP2_HUMAN_9P278 56 DRRGRQVLFDSKAVQKIEEVTQAQTEDEVPIK-----ISAKCCQSSSSVSSSSSSSSSHSSSSGGSSH 117
FNIP2_MOUSE_Q80TD3 52 ERRGRQVMFDSRAVQKMEEAQAQKAEDEVPIK-----MSARCCQSSSSSSSSSSSSSSSSSGFGGSLQ 113
GH23617p_D.melanogaster_Q 26 -DDTRLLFDSNALQKVMHKD-QSATSASISSTSGGGKFLKNEKYTSLQNGKIPSKSHSSN---GSNF 90
Lst4_S.cerevisiae_P34239_ 132 CRNNYRDIFDYTTSK-----ISNSM----- 151
Lst4_K.lactis_Q6CXP4 79 SRNNYQVVLDSHSSVN-----FHTG----- 97
Consensus_ss:          hh eeeeee hh
```

β2

Longin

**FNIP2\_HUMAN ss:**

```
FNIP2_HUMAN_9P278 118 HAKEQLPKYQYTRPA-SDVNLMLGEMMFGS-VAM-SYKGSTTTTTTTTTLKIHβ3YIRSPβ4QLMISKVFSARMGS----- 178
FNIP2_MOUSE_Q80TD3 114 HAKQQLPKYQYTRPA-SDVSMLGEMMFGS-VAM-SYKGSTTTTTTTTTLKIHβ3YIRSPβ4QLMISKVFSATMGS----- 174
GH23617p_D.melanogaster_Q 91 IEVCAEYGYKHNRPSGADIβ1TPVGEβ2MVFGS-LPM-SFCGTALKVHWLPEPSRILCSQVYLTPTSNGGSGHS 158
Lst4_S.cerevisiae_P34239_ 152 -----EQIRPSELKEYIFGSPVRSβ1SD-LTQCCKIRTIPNSDLVLTIRIFYYTHQ----- 199
Lst4_K.lactis_Q6CXP4 98 -----AHIPNLNELKDYIFGSSIRTIβ1DYSASSDKIKVVKSANIVLFTRIFYLNEK----- 146
Consensus_ss:          hhhhhhhhh          eeeeee          eeeeeeeeee
```

**Disordered region**

**FNIP2\_HUMAN ss:**

```
FNIP2_HUMAN_9P278 287 β5STDETFSLAEETCCSNPA---MVRβ2RKα1IAISβ3IIFSLCEKEα2EAQRNα3FQDFα4FFSHα5FPLEFSHMNRLKSAIEK 353
FNIP2_MOUSE_Q80TD3 283 β5STDETFSLAEETCCSNPA---MVRβ2RKα1IAISβ3IIFSLCEREAAQα2RDQDFα4FFSHα5FPLEFSHMNRLKSAIEK 349
GH23617p_D.melanogaster_Q 362 YRRASYCANETRSPNPEMGRα1QRANRRRAKβ1GLAVCISMSESFEEEMELFCSEHIALESMLSRβ2LRASTEL 431
Lst4_S.cerevisiae_P34239_ 200 -----YNRIβ1AISLCIP-----RILLPVVAESWSSISSWLTQTQKMLIG 237
Lst4_K.lactis_Q6CXP4 147 -----STLβ1-RIAISCCVT-----DDVLPVLTβ2ECWPHISSβ3FLDQCENTLLK 185
Consensus_ss:          hh          eeeeeeee          hhhhhhhhhhhhhhhhhhhhhhhhhhhhhhhhhhh
```

**FNIP2\_HUMAN ss:**

```
FNIP2_HUMAN_9P278 354 α1AMISCRK-----IAESSLRVQ-----FYVSRα2LMEALGEFR-----GTIWNLYSVPRIAEα3PVW 400
FNIP2_MOUSE_Q80TD3 350 α1AMISCRK-----ISESSLRVQ-----FYVSRα2LMEALGEFR-----GTIWNLYSVPRIAEα3PVW 396
GH23617p_D.melanogaster_Q 432 AYINHKα1N-----FLQIMFQAWQDTQ-----QWFSα2DLTAPRIKTPVW 468
Lst4_S.cerevisiae_P34239_ 238 FLTα1KNRIMQENTGNYSNNSVIKα2L---SNIDIRα3THYP--KEIEIMVQTLQKRVIα4PGLRSMSEIα5PRL--- 297
Lst4_K.lactis_Q6CXP4 186 YLAKND-----TQF---LPHDWKARα1NC--IEVAα2AVLQTFQα3RKIα4IPLLSGYSα5DTα6PRL--- 231
Consensus_ss:          hhhhhh          h          hhhhhhhhhhhhhhhhhhhhhhhhhhhhhhh ee
```

**FNIP2\_HUMAN ss:**

```
FNIP2_HUMAN_9P278 401 α1LTMMSG-TLEKNQLCQα2RFLKEFTLLIEQIN---KNQα3Fα4ALLTAVLTYHLAWVα5PTMα6VPVDHPPα7IKAFSEK 466
FNIP2_MOUSE_Q80TD3 397 α1LTMMSN-TLEKNQLCQα2RFLKEFTLLIEQVN---KNQα3Fα4ALLTAVLTYHLAWVα5PTMα6VPVDHPPα7IKAFSEK 462
GH23617p_D.melanogaster_Q 469 LSITTSα1SGSKYSTVAERFIKELCDLLSα2FADTKDSNFFISTα3MLTGILTHHLGWα4VATVSAFNSSGSKRSα5ESS 538
Lst4_S.cerevisiae_P34239_ 298 ---FLY-PETFKEFVHVWFKSIFNWα1IEIKDG-PKLGLα2PLLMAMIISDYRHTIREL----- 348
Lst4_K.lactis_Q6CXP4 232 ---FLY-PMDSIPIYIKTWVα1YVFNWIEIKDG-PRVα2RFLPILLAKLRYDFASLKEN----- 282
Consensus_ss:          hhhhhhhhhhhhhhhhhhhhh          hhhhhhhhhhhhhhhhhhhhh
```

**FNIP2\_HUMAN ss:**

```
FNIP2_HUMAN_9P278 467 RTSQSVNMLA-----KTHβ1PNPLWAQLGDLYGAIα1GSα2PVRLTRα3TVVVGKQα4DLVQα5RILYα6LVLYFLRCSEL 530
FNIP2_MOUSE_Q80TD3 463 RTSQSVNMLA-----KTHβ1PNPLWAQLGDLYGAIα1GSα2PVRLTRα3TVVVGKQα4DLVQα5RILYα6LVLYFLRCSEL 526
GH23617p_D.melanogaster_Q 539 ASAAAIEQRAKLLQVQAKHPYNALWAQLGDLYGAIα1GMPα2PKLARTIVCGAEKLWVEKLLNVLTYFIRCSEV 608
Lst4_S.cerevisiae_P34239_ 349 -----KTSKIVILSGNMVα1VANKLLFILSALLEPK-- 377
Lst4_K.lactis_Q6CXP4 283 -----SNTRIVILα1TGNMNVANRLIFILTAFLGPH-- 311
Consensus_ss:          hhhhhhhhh          hhhhhhhhhhh          eeeeeeee          hhhhhhhhhhhhhhhhhhhhh
```

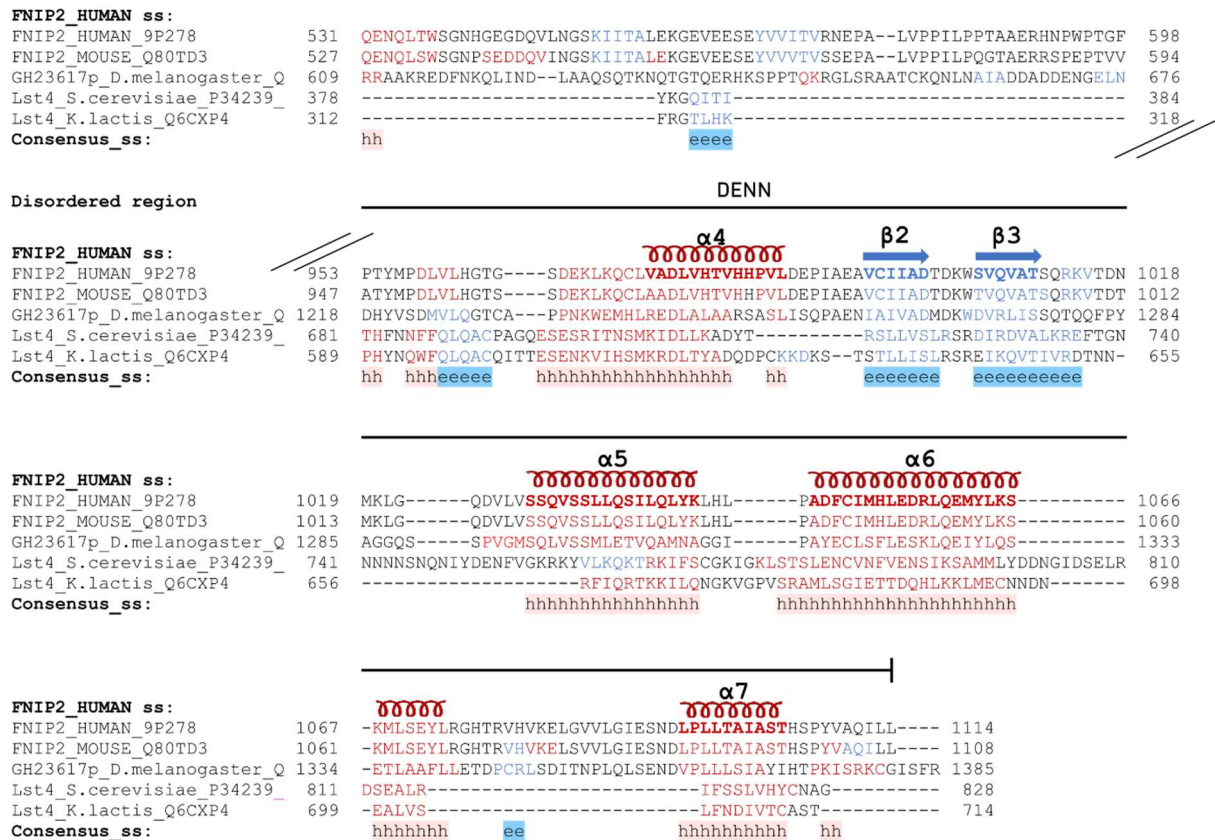

**Supplementary Figure 2: Alignment of multiple FNIP2 sequences with their respective yeast orthologue, Lst4.** Multiple sequence alignment and secondary structure prediction of FNIP2 sequences from different species were made with PROMALS3D software (Pei, Kim, and Grishin 2008). Blue residues correspond to putative  $\beta$ -strands while red residues to potential  $\alpha$ -helices. The consensus secondary structure is represented following the next code: e corresponds to  $\beta$ -strands and h to  $\alpha$ -helices. Basic structural elements and domains based on the two recent human FLCN-FNIP2 structures (PDB: 6NZZ, PDB: 6ULG) (Lawrence et al. 2019; Shen et al. 2019) are displayed on the top of the alignment. Protein sequences from Uniprot (FNIP2 human: Q9P278, FNIP2 mouse: Q80TD3, GH23617p *D.melanogaster* Q8T0L7, Lst4 *S.cerevisiae* P34239, Lst7 *K.lactis* Q6CXP4).

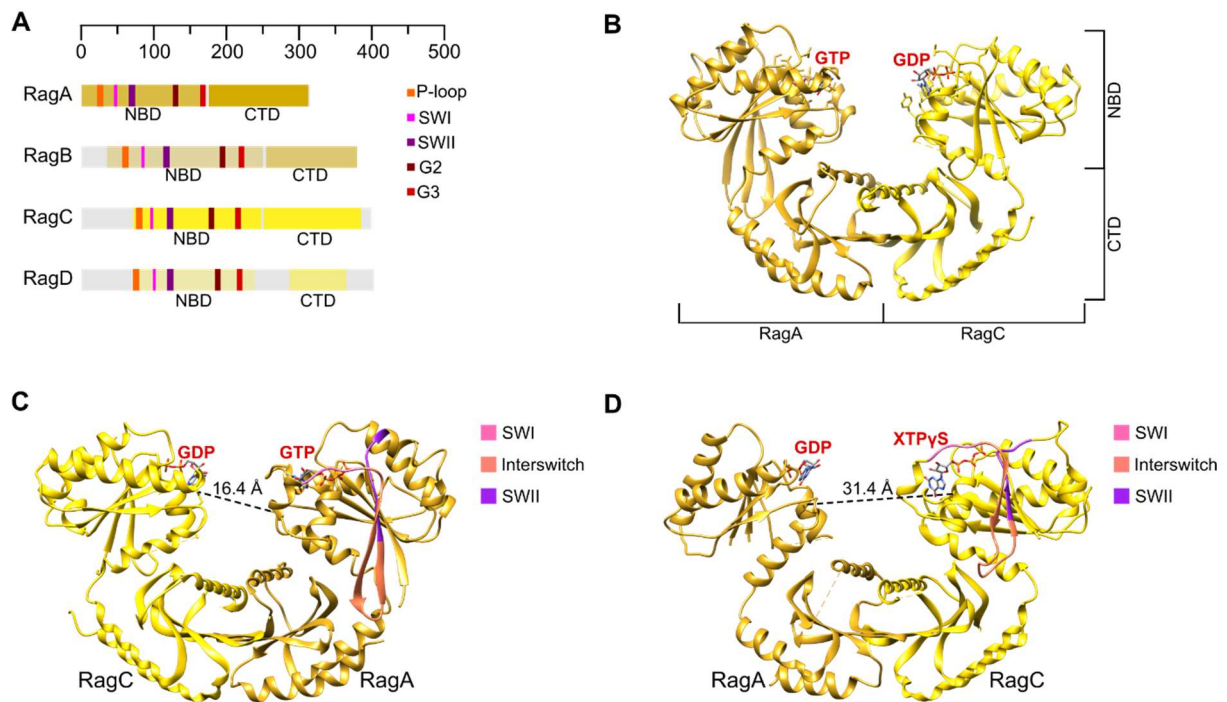

**Supplementary Figure 3: The Rag GTPases.** (A) Schematic representation of the human Rag GTPases with domains coloured accordingly and typical regulatory elements from GTPases highlighted in small boxes. Top ruler represents number of amino acids. (B) RagA-RagC heterodimer structure with GTP and GDP bound respectively (PDB: 6U62) (Rogala et al. 2019). Both Rag GTPases are shown in cartoon representation, with RagA shown in gold and RagC in yellow. (C) Structure of the RagA-RagC heterodimer on its active nucleotide state (PDB: 6U62) (Rogala et al. 2019). Switch and interswitch regions from RagA-GTP are coloured according to the legend on the left. (D) Structure of the RagA-RagC heterodimer when it forms complex with Ragulator and FLCN-FNIP2 (PDB: 6NZD) (Lawrence et al. 2019). In this case, the Rag GTPase heterodimer is on its inactive nucleotide binding state, that is RagA-GDP and RagC-GTP (XTP $\gamma$ S). Switch and interswitch regions from RagC-GTP are coloured according to the legend on the right.

## References

- Lawrence, Rosalie E., Simon A. Fromm, Yangxue Fu, Adam L. Yokom, Do Jin Kim, Ashley M. Thelen, Lindsey N. Young, et al. 2019. "Structural Mechanism of a Rag GTPase Activation Checkpoint by the Lysosomal Folliculin Complex." *Science*, October, eaax0364. <https://doi.org/10.1126/science.aax0364>.
- Pei, Jimin, Bong-Hyun Kim, and Nick V. Grishin. 2008. "PROMALS3D: A Tool for Multiple Protein Sequence and Structure Alignments." *Nucleic Acids Research* 36 (7): 2295–2300. <https://doi.org/10.1093/nar/gkn072>.
- Rogala, Kacper B., Xin Gu, Jibril F. Kedir, Monther Abu-Remaileh, Laura F. Bianchi, Alexia M. S. Bottino, Rikke Dueholm, et al. 2019. "Structural Basis for the Docking of MTORC1 on the Lysosomal Surface." *Science*, October, eaay0166. <https://doi.org/10.1126/science.aay0166>.
- Shen, Kuang, Kacper B. Rogala, Hui-Ting Chou, Rick K. Huang, Zhiheng Yu, and David M. Sabatini. 2019. "Cryo-EM Structure of the Human FLCN-FNIP2-Rag-Ragulator Complex." *Cell* 179 (November): 1–11. <https://doi.org/10.1016/j.cell.2019.10.036>.
